# Supplementary material for: Bifidobacterium longum subsp. infantis EVC001 Administration Is Associated with a Significant Reduction in the Incidence of Necrotizing Enterocolitis in Very Low Birth Weight Infants
Source: PubMed Central journal article supplement (PMC10289059; doi:10.1016/j.jpeds.2021.12.070), 2022-01-12
Supplement: NIHMS1906110-supplement-Supplementary_data.pdf [file NIHMS1906110-supplement-Supplementary_data.pdf]

# Appendix 1

Code ▾

07/15/2021

Code

Code

Code

## Log Binomial regression (adjusted) with effect modifier

Code

```
##
## Call:
## glm(formula = NEC01 ~ Cohort + Sex + BW + Weeks + Cohort * `Mode of del`,
##      family = binomial(link = "log"), data = df)
##
## Deviance Residuals:
##      Min       1Q   Median       3Q      Max
## -1.0036  -0.4523  -0.2905  -0.1672   2.9490
##
## Coefficients:
##              Estimate Std. Error z value Pr(>|z|)
## (Intercept)      0.7663929   2.0450308    0.375  0.70784
## CohortEvivo     -2.1136367   0.7200834   -2.935  0.00333 **
## SexM            -0.3884195   0.3237545   -1.200  0.23024
## BW             -0.0011494   0.0008039   -1.430  0.15277
## Weeks          -0.0537502   0.0914723   -0.588  0.55679
## `Mode of del`VD -1.5011510   0.7187669   -2.089  0.03675 *
## CohortEvivo:`Mode of del`VD 2.8644492  1.1448699    2.502  0.01235 *
## ---
## Signif. codes:  0 '***' 0.001 '**' 0.01 '*' 0.05 '.' 0.1 ' ' 1
##
## (Dispersion parameter for binomial family taken to be 1)
##
##      Null deviance: 266.15  on 482  degrees of freedom
## Residual deviance: 232.55  on 476  degrees of freedom
## (4 observations deleted due to missingness)
## AIC: 246.55
##
## Number of Fisher Scoring iterations: 7
```

Relative Risk:

Code

```

##           (Intercept)           CohortEvivo
##           2.152             0.121
##           SexM             BW
##           0.678             0.999
##           Weeks           `Mode of del`VD
##           0.948             0.223
## CohortEvivo:`Mode of del`VD
##           17.539

```

95% confidence intervals:

Code

```

##           2.5 % 97.5 %
## (Intercept)           0.035 164.443
## CohortEvivo           0.020  0.389
## SexM                 0.349  1.275
## BW                   0.997  1.000
## Weeks                0.779  1.138
## `Mode of del`VD      0.036  0.723
## CohortEvivo:`Mode of del`VD 2.052 218.422

```

## Effect modifiers - Weight Subgroups

| ##                                  | Estimate | Std. Error | z value | Pr(> z ) |
|-------------------------------------|----------|------------|---------|----------|
| ## (Intercept)                      | -1.371   | 0.210      | -6.546  | 0.000    |
| ## Cohort_subgroupControl VLBW      | -1.519   | 0.482      | -3.148  | 0.002    |
| ## Cohort_subgroupEvivo ELBW        | -2.125   | 1.007      | -2.111  | 0.035    |
| ## Cohort_subgroupEvivo VLBW        | -17.015  | 898.793    | -0.019  | 0.985    |
| ## SexM                             | -0.743   | 0.412      | -1.805  | 0.071    |
| ## Cohort_subgroupControl VLBW:SexM | 0.565    | 0.773      | 0.732   | 0.464    |
| ## Cohort_subgroupEvivo ELBW:SexM   | 1.601    | 1.204      | 1.330   | 0.184    |
| ## Cohort_subgroupEvivo VLBW:SexM   | 14.986   | 898.793    | 0.017   | 0.987    |

Code

| ##                                  | Estimate | Std. Error | z value | Pr(> z ) |
|-------------------------------------|----------|------------|---------|----------|
| ## (Intercept)                      | -1.371   | 0.210      | -6.546  | 0.000    |
| ## Cohort_subgroupControl VLBW      | -1.519   | 0.482      | -3.148  | 0.002    |
| ## Cohort_subgroupEvivo ELBW        | -2.125   | 1.007      | -2.111  | 0.035    |
| ## Cohort_subgroupEvivo VLBW        | -17.015  | 898.793    | -0.019  | 0.985    |
| ## SexM                             | -0.743   | 0.412      | -1.805  | 0.071    |
| ## Cohort_subgroupControl VLBW:SexM | 0.565    | 0.773      | 0.732   | 0.464    |
| ## Cohort_subgroupEvivo ELBW:SexM   | 1.601    | 1.204      | 1.330   | 0.184    |
| ## Cohort_subgroupEvivo VLBW:SexM   | 14.986   | 898.793    | 0.017   | 0.987    |

Code

| ##                                | Estimate | Std. Error | z value | Pr(> z ) |
|-----------------------------------|----------|------------|---------|----------|
| ## (Intercept)                    | -2.176   | 0.963      | -2.259  | 0.024    |
| ## Cohort_subgroupControl VLBW    | -1.316   | 3.118      | -0.422  | 0.673    |
| ## Cohort_subgroupEvivo ELBW      | -0.333   | 2.731      | -0.122  | 0.903    |
| ## Cohort_subgroupEvivo VLBW      | -5.575   | 8.738      | -0.638  | 0.523    |
| ## BW                             | 0.001    | 0.001      | 0.564   | 0.573    |
| ## Cohort_subgroupControl VLBW:BW | 0.000    | 0.003      | -0.103  | 0.918    |
| ## Cohort_subgroupEvivo ELBW:BW   | -0.001   | 0.003      | -0.353  | 0.724    |
| ## Cohort_subgroupEvivo VLBW:BW   | 0.002    | 0.007      | 0.258   | 0.797    |

Code

| ##                                   | Estimate | Std. Error | z value | Pr(> z ) |
|--------------------------------------|----------|------------|---------|----------|
| ## (Intercept)                       | -5.535   | 2.384      | -2.322  | 0.020    |
| ## Cohort_subgroupControl VLBW       | 1.388    | 5.129      | 0.271   | 0.787    |
| ## Cohort_subgroupEvivo ELBW         | 9.120    | 8.262      | 1.104   | 0.270    |
| ## Cohort_subgroupEvivo VLBW         | 11.710   | 17.641     | 0.664   | 0.507    |
| ## Weeks                             | 0.148    | 0.089      | 1.662   | 0.096    |
| ## Cohort_subgroupControl VLBW:Weeks | -0.109   | 0.175      | -0.620  | 0.535    |
| ## Cohort_subgroupEvivo ELBW:Weeks   | -0.398   | 0.321      | -1.241  | 0.215    |
| ## Cohort_subgroupEvivo VLBW:Weeks   | -0.520   | 0.617      | -0.843  | 0.399    |

Code

Code

| ##                                       | Estimate | Std. Error | z value | Pr(> z ) |
|------------------------------------------|----------|------------|---------|----------|
| ## (Intercept)                           | -1.725   | 0.214      | -8.072  | 0.000    |
| ## Cohort_subgroupControl VLBW           | -1.220   | 0.405      | -3.011  | 0.003    |
| ## Cohort_subgroupEvivo ELBW             | -1.032   | 0.529      | -1.951  | 0.051    |
| ## Cohort_subgroupEvivo VLBW             | -2.797   | 1.017      | -2.750  | 0.006    |
| ## `SGA?`Yes                             | 0.338    | 0.413      | 0.819   | 0.413    |
| ## Cohort_subgroupControl VLBW:`SGA?`Yes | -0.572   | 1.117      | -0.512  | 0.609    |
| ## Cohort_subgroupEvivo ELBW:`SGA?`Yes   | -15.968  | 1721.057   | -0.009  | 0.993    |
| ## Cohort_subgroupEvivo VLBW:`SGA?`Yes   | -14.203  | 1539.360   | -0.009  | 0.993    |

| ##                                             | Estimate | Std. Error | z value |
|------------------------------------------------|----------|------------|---------|
| ## (Intercept)                                 | -1.470   | 0.183      | -8.032  |
| ## Cohort_subgroupControl VLBW                 | -1.334   | 0.388      | -3.433  |
| ## Cohort_subgroupEvivo ELBW                   | -1.880   | 0.718      | -2.618  |
| ## Cohort_subgroupEvivo VLBW                   | -17.917  | 1112.976   | -0.016  |
| ## `Mode of del`VD                             | -1.749   | 0.997      | -1.755  |
| ## Cohort_subgroupControl VLBW:`Mode of del`VD | 0.768    | 1.445      | 0.532   |
| ## Cohort_subgroupEvivo ELBW:`Mode of del`VD   | 2.902    | 1.386      | 2.094   |
| ## Cohort_subgroupEvivo VLBW:`Mode of del`VD   | 17.768   | 1112.977   | 0.016   |
| ##                                             | Pr(> z ) |            |         |
| ## (Intercept)                                 | 0.000    |            |         |
| ## Cohort_subgroupControl VLBW                 | 0.001    |            |         |
| ## Cohort_subgroupEvivo ELBW                   | 0.009    |            |         |
| ## Cohort_subgroupEvivo VLBW                   | 0.987    |            |         |
| ## `Mode of del`VD                             | 0.079    |            |         |
| ## Cohort_subgroupControl VLBW:`Mode of del`VD | 0.595    |            |         |
| ## Cohort_subgroupEvivo ELBW:`Mode of del`VD   | 0.036    |            |         |
| ## Cohort_subgroupEvivo VLBW:`Mode of del`VD   | 0.987    |            |         |

Code

| ##                                    | Estimate | Std. Error | z value | Pr(> z ) |
|---------------------------------------|----------|------------|---------|----------|
| ## (Intercept)                        | -1.618   | 0.183      | -8.852  | 0.000    |
| ## Cohort_subgroupControl VLBW        | -1.560   | 0.413      | -3.781  | 0.000    |
| ## Cohort_subgroupEvivo ELBW          | -1.259   | 0.519      | -2.425  | 0.015    |
| ## Cohort_subgroupEvivo VLBW          | -2.967   | 1.012      | -2.933  | 0.003    |
| ## CHDYes                             | -15.769  | 1808.042   | -0.009  | 0.993    |
| ## Cohort_subgroupControl VLBW:CHDYes | 17.560   | 1808.042   | 0.010   | 0.992    |
| ## Cohort_subgroupEvivo ELBW:CHDYes   | 1.259    | 2556.958   | 0.000   | 1.000    |
| ## Cohort_subgroupEvivo VLBW:CHDYes   | 2.967    | 2172.997   | 0.001   | 0.999    |

Code

P-values from effect modifier model evaluating birth weight subgroup\*cohort, with the baseline being 'No EVC001 ELBW infants'. The 'All infants' column contains the resulting P-values of the covariate cohort interactions without subgroup analysis.

| <b>Covariate</b>    | No EVC001,<br>≥ 1000g BW<br>subgroup<br>(n=176) | EVC001,<br>ELBW subgroup<br>(n=75) | EVC001,<br>≥ 1000g BW<br>subgroup<br>(n=107) | All infants<br>(n=483) |
|---------------------|-------------------------------------------------|------------------------------------|----------------------------------------------|------------------------|
| Sex                 | 0.46                                            | 0.18                               | 0.99                                         | 0.15                   |
| Birth weight        | 0.92                                            | 0.72                               | 0.80                                         | 0.69                   |
| GA at birth         | 0.54                                            | 0.22                               | 0.40                                         | 0.21                   |
| SGA                 | 0.61                                            | 0.99                               | 0.99                                         | 0.99                   |
| Mode of<br>Delivery | 0.60                                            | 0.04                               | 0.99                                         | 0.01                   |
| CHD                 | 0.99                                            | 1.00                               | 1.00                                         | 0.99                   |
